# Supplementary material
Source: Royal Society of Chemistry journal article supplement (doi:10.1039/d6nr01237j)
Supplement: d6nr01237j1.pdf [file d6nr01237j1.pdf]

## Supporting Information

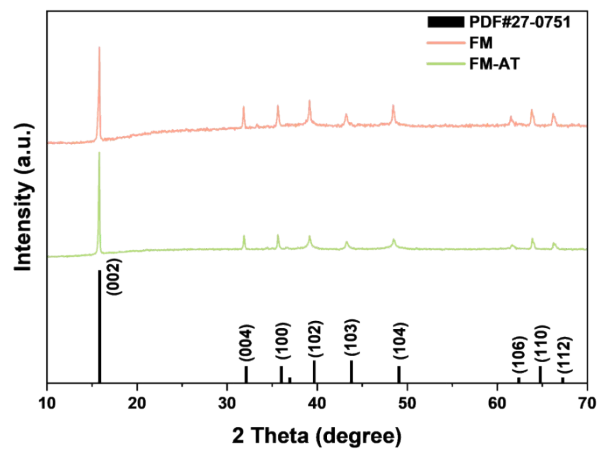

Fig. S1 Powder XRD patterns of the FM and FM-AT samples.

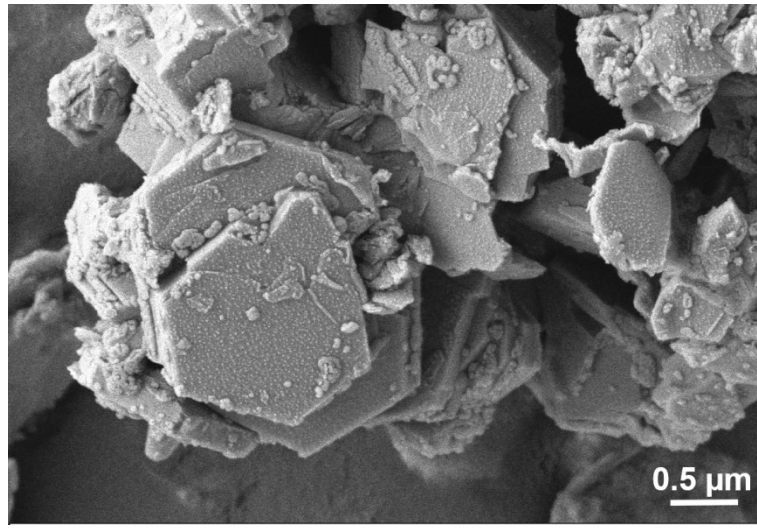

**Fig. S2** SEM image of the FM sample.

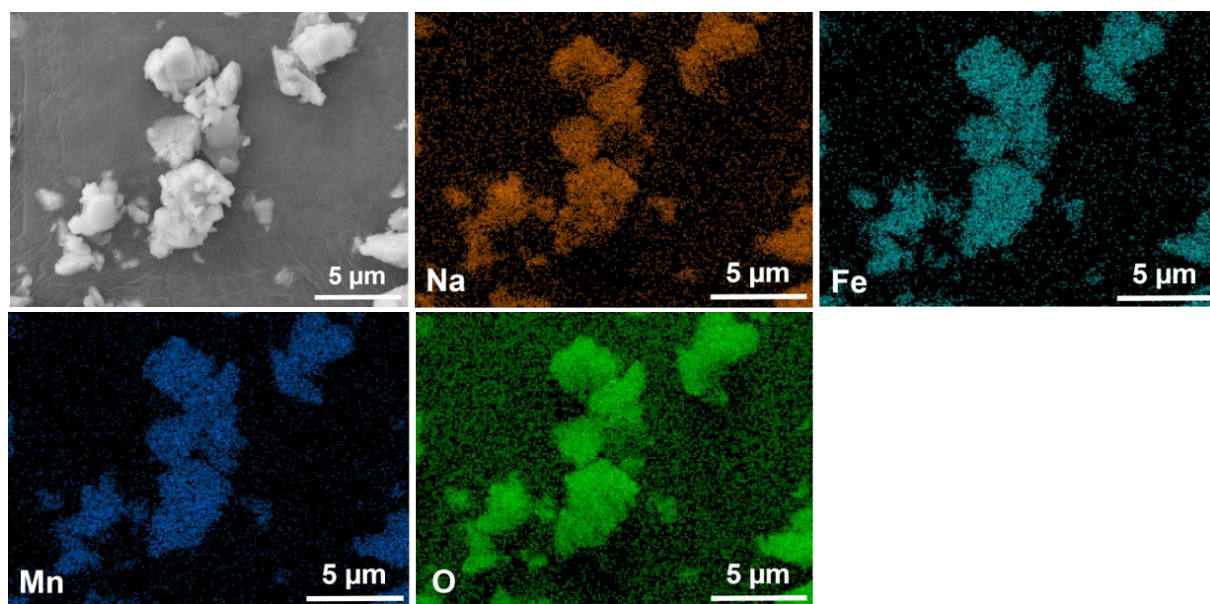

**Fig. S3** SEM-EDS elemental mapping of the FM sample.

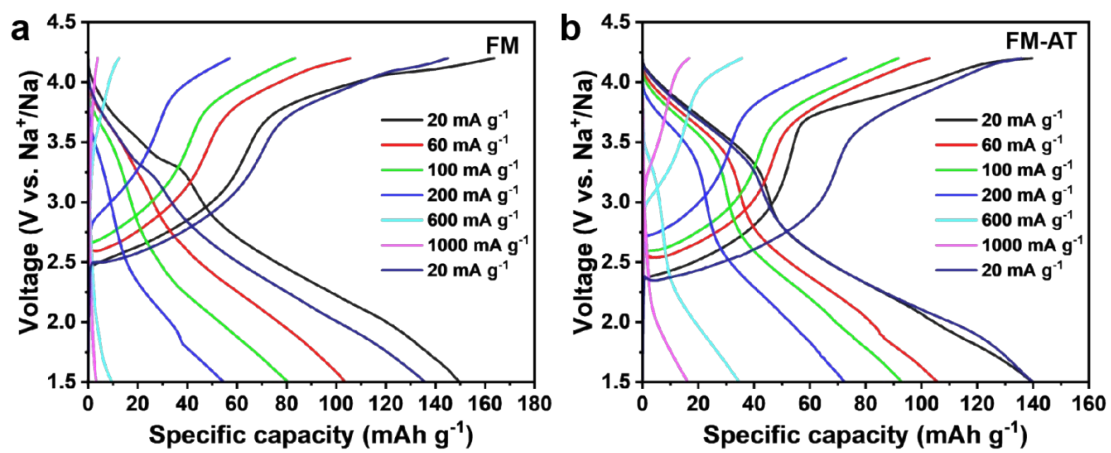

**Fig. S4** Comparative galvanostatic charge-discharge profiles of (a) FM and (b) FM-AT electrodes at various current densities.

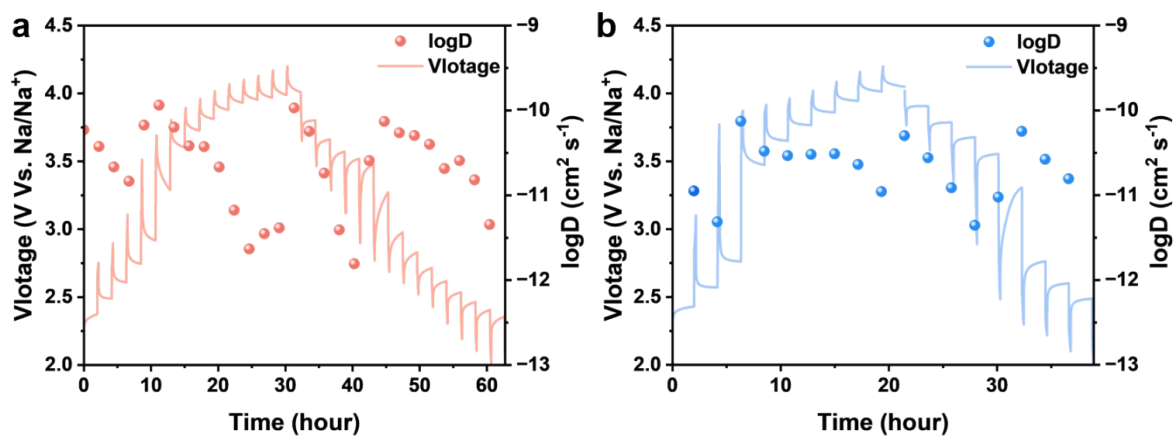

Fig. S5 Galvanostatic intermittent titration technique (GITT) profiles and corresponding  $\text{Na}^+$  diffusion coefficients for (a) FM and (b) FM-AT electrodes at 20 mA g<sup>-1</sup>.
